# Supplementary material for: Myticalins: A Novel Multigenic Family of Linear, Cationic Antimicrobial Peptides from Marine Mussels (Mytilus spp.)
Source: PubMed Central journal article supplement (PMC5577615; doi:10.3390/md15080261), 2017-08-22
Supplement: marinedrugs-15-00261-s001.pdf [file marinedrugs-15-00261-s001.pdf]

### In vitro TR/TR in presence of Myticalin A5 (*E. coli* system)

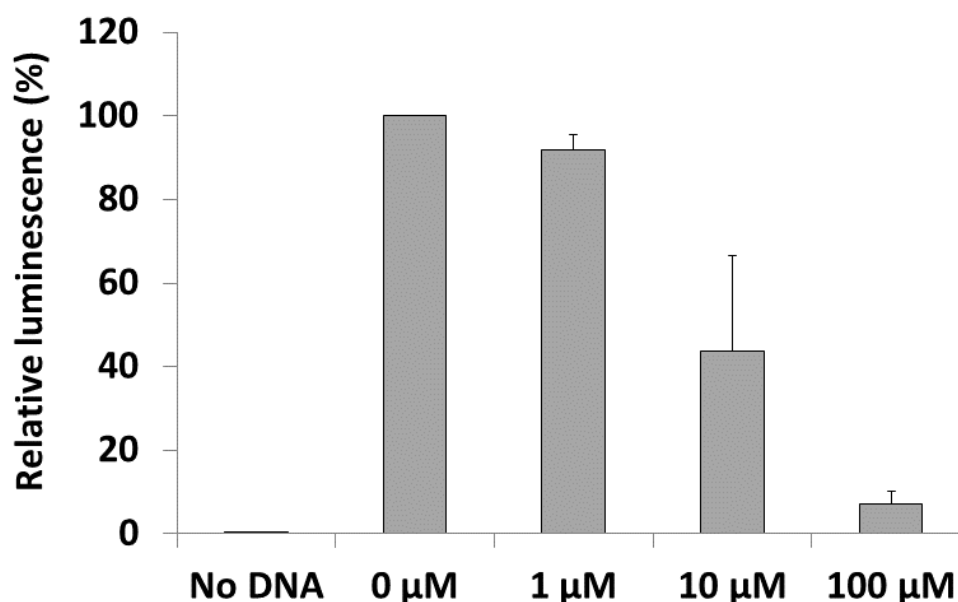

**Figure S1.** *in vitro* coupled transcription/translation in presence of Myticalin A5 in an *Escherichia coli* system. The positive control received water instead of the peptide. The negative control received water instead of the peptide and the DNA template encoding the luciferase. The results are the average of three independent experiments.

**Table S1:** Presence/absence patterns of myticalin genes in 20 mussel specimens collected in the Gulf of Trieste, Italy. ✓: present; ✗: absent; M: presence of multiple amplification bands.

| Myticalin       | sample number |   |   |   |   |   |   |   |   |    |    |    |    |    |    |    |    |    |    |    |
|-----------------|---------------|---|---|---|---|---|---|---|---|----|----|----|----|----|----|----|----|----|----|----|
|                 | 1             | 2 | 3 | 4 | 5 | 6 | 7 | 8 | 9 | 10 | 11 | 12 | 13 | 14 | 15 | 16 | 17 | 18 | 19 | 20 |
| A3/A4/A5/A8/A10 | M             | M | ✓ | M | M | ✓ | ✓ | ✓ | M | M  | M  | ✓  | M  | ✓  | ✓  | ✓  | M  | M  | M  | ✓  |
| B1              | ✓             | ✓ | ✗ | ✗ | ✗ | ✓ | ✗ | ✗ | ✗ | ✗  | ✓  | ✗  | ✗  | ✓  | ✗  | ✗  | ✗  | ✗  | ✗  | ✗  |
| C2              | ✓             | ✓ | ✓ | ✓ | ✓ | ✓ | ✓ | ✓ | ✓ | ✓  | ✓  | ✓  | ✓  | ✓  | ✓  | ✓  | ✓  | ✓  | ✓  | ✓  |
| C5              | ✓             | ✓ | ✓ | ✓ | ✓ | ✓ | ✓ | ✓ | ✓ | ✓  | ✓  | ✓  | ✓  | ✓  | ✓  | ✓  | ✓  | ✓  | ✓  | ✓  |
| C6              | ✗             | ✓ | ✓ | ✗ | ✗ | ✗ | ✗ | ✗ | ✗ | ✗  | ✗  | ✗  | ✗  | ✗  | ✗  | ✗  | ✗  | ✗  | ✓  | ✓  |
| C8              | ✗             | ✗ | ✗ | ✗ | ✗ | ✗ | ✗ | ✗ | ✗ | ✗  | ✗  | ✗  | ✗  | ✗  | ✗  | ✗  | ✗  | ✗  | ✗  | ✗  |
| D1/D2           | ✓             | ✓ | ✓ | ✓ | ✓ | ✓ | ✓ | ✓ | ✓ | ✓  | ✓  | ✓  | ✓  | ✓  | ✓  | ✓  | ✓  | ✓  | ✓  | ✓  |
| D3/D4/D5        | M             | ✓ | ✓ | M | M | M | M | M | ✗ | ✗  | ✗  | ✗  | ✓  | ✗  | ✗  | M  | M  | M  | ✓  | ✓  |

**Table S2.** List of transcriptomes screened for the presence of myticalins.

| <b><i>Mytilus</i> spp.</b>       |                                                                                         |
|----------------------------------|-----------------------------------------------------------------------------------------|
| <b>Species</b>                   | <b>SRA datasets</b>                                                                     |
| <i>Mytilus californianus</i>     | SRX565219-20                                                                            |
| <i>Mytilus chilensis</i>         | SRX1850488-9                                                                            |
| <i>Mytilus coruscus</i>          | SRR2895130-2, SRX792025, SRX791940                                                      |
| <i>Mytilus edulis</i>            | SRX565221-4, ERR1414442-3, SRR1560431                                                   |
| <i>Mytilus galloprovincialis</i> | SRX126947-50; SRX565225-30; SRX1246876-7; SRX1240182; SRX389462-6; SRX389338; SRX386628 |
| <i>Mytilus trossulus</i>         | SRX565231-2                                                                             |
| <b>Other mytiloids</b>           |                                                                                         |
| <b>Species</b>                   | <b>SRA datasets</b>                                                                     |
| <i>Bathymodiolus azoricus</i>    | DRR048281                                                                               |
| <i>Bathymodiolus platifrons</i>  | SRX1933530; SRX1933483; SRX610901-2; SRX436365                                          |
| <i>Bathymodiolus manusensis</i>  | SRX2481526-32                                                                           |
| <i>Geukensia demissa</i>         | kindly provided by prof. PA Fields                                                      |
| <i>Lithophaga lithophaga</i>     | SRX1940727                                                                              |
| <i>Modiolus modiolus</i>         | SRX2357782                                                                              |
| <i>Modiolus kurilensis</i>       | SRX2481530-2                                                                            |
| <i>Modiolus philippinarum</i>    | SRX1934914-8                                                                            |
| <i>Mytilisepta virgata</i>       | SRX2497505; SRX2515148; SRX2515152; SRX2515284; SRX2515292                              |
| <i>Perna viridis</i>             | SRX643367; SRX643380-5; SRX1873938-47                                                   |
| <i>Perumytilus purpuratus</i>    | SRX2210805                                                                              |
| <b>Other bivalves</b>            |                                                                                         |
| <b>Species</b>                   | <b>SRA datasets</b>                                                                     |
| <i>Anadara trapezia</i>          | SRX323049                                                                               |
| <i>Arctica islandica</i>         | SRX687761                                                                               |
| <i>Argopecten irradians</i>      | SRX470082                                                                               |
| <i>Astarte sulcata</i>           | SRX644667                                                                               |
| <i>Atrina rigida</i>             | SRX687763                                                                               |
| <i>Azumapecten farreri</i>       | SRX404364; SRX218546                                                                    |
| <i>Cardites antiquata</i>        | SRX687773                                                                               |
| <i>Cerastoderma edule</i>        | SRX687776                                                                               |
| <i>Corbicula fluminea</i>        | SRX209446                                                                               |
| <i>Crassostrea angulata</i>      | SRX481252-4                                                                             |
| <i>Crassostrea corteziensis</i>  | SRX641340; SRX471689                                                                    |
| <i>Crassostrea hongkongensis</i> | SRX365659-60                                                                            |
| <i>Crassostrea virginica</i>     | SRX551498-516; SRX118365                                                                |
| <i>Cycladicama cumingii</i>      | SRX687783                                                                               |
| <i>Cyrenoida floridana</i>       | SRX687777                                                                               |
| <i>Diplodonta</i> sp. VG-2014    | SRX701840                                                                               |

|                                    |                                                                                  |
|------------------------------------|----------------------------------------------------------------------------------|
| <i>Donacilla cornea</i>            | SRX687785                                                                        |
| <i>Elliptio complanata</i>         | TSA: GAHW00000000.1                                                              |
| <i>Ennucula tenuis</i>             | SRX091980                                                                        |
| <i>Eucrassatrella cumingii</i>     | SRX687772                                                                        |
| <i>Galeomma turtoni</i>            | SRX687768                                                                        |
| <i>Glossus humanus</i>             | SRX687780                                                                        |
| <i>Hiatella arctica</i>            | SRX687781                                                                        |
| <i>Lampsilis cardium</i>           | SRX687767                                                                        |
| <i>Lamychaena hians</i>            | SRX687779                                                                        |
| <i>Lasaea adansoni</i>             | SRX687778                                                                        |
| <i>Laternula elliptica</i>         | SRX1614611; SRX807593-8                                                          |
| <i>Lyonsia floridana</i>           | SRX687774                                                                        |
| <i>Margaritifera margaritifera</i> | SRX687769                                                                        |
| <i>Mercenaria campechiensis</i>    | SRX644681                                                                        |
| <i>Meretrix meretrix</i>           | SRX666741-4                                                                      |
| <i>Mizuhopecten yessoensis</i>     | SRX220583; SRX221165                                                             |
| <i>Mya arenaria</i>                | SRX687786                                                                        |
| <i>Myochama anomioides</i>         | SRX644684                                                                        |
| <i>Neotrigonia margaritacea</i>    | SRX644685                                                                        |
| <i>Ostrea chilensis</i>            | SRX565248-9                                                                      |
| <i>Ostrea edulis</i>               | SRX565250-9                                                                      |
| <i>Ostrea lurida</i>               | SRX175407                                                                        |
| <i>Ostreola stentina</i>           | SRX565260-1                                                                      |
| <i>Pecten maximus</i>              | SRX497464                                                                        |
| <i>Phacoides pectinatus</i>        | SRX687782                                                                        |
| <i>Pinctada martensi</i>           | SRX268302                                                                        |
| <i>Placopecten magellanicus</i>    | SRX687766                                                                        |
| <i>Polymesoda caroliniana</i>      | SRX687784                                                                        |
| <i>Pyganodon grandis</i>           | SRX310669-84                                                                     |
| <i>Ruditapes decussatus</i>        | SRX348803-8                                                                      |
| <i>Ruditapes philippinarum</i>     | SRX076440-63                                                                     |
| <i>Saccostrea glomerata</i>        | SRX1884692-727; SRX1838009-12; SRX1797576-85; SRX964403-13; SRX878217; SRX845376 |
| <i>Solemya velum</i>               | SRX091478                                                                        |
| <i>Sphaerium nucleus</i>           | SRX687787                                                                        |
| <i>Uniomerus tetralasmus</i>       | SRX310669-97                                                                     |
| <i>Villosa lienosa</i>             | SRX101836-9                                                                      |
| <i>Yoldia limatula</i>             | SRX687760                                                                        |

Table S3. In silico prediction of mytilin biological activities.

|     | sequence of mature peptide                 | length | isoelectric point | CAMP SVM | CAMP Random Forest | CAMP Discriminant Analysis | CAMP Neural Artificial Network | DBA predictor | iAMP-2L                         | ANTIBP2 score | ANTIBP2 classification | AMPA | Class AMP - SVM | ClassAMP - SVM (classification) | ClassAMP - RF (classification) | ADP top hit   | ADP details | AVP pred                                | dPA BBs | cell PD | Pro% | Arg% | Trp% | Tyr% | Thr% |     |
|-----|--------------------------------------------|--------|-------------------|----------|--------------------|----------------------------|--------------------------------|---------------|---------------------------------|---------------|------------------------|------|-----------------|---------------------------------|--------------------------------|---------------|-------------|-----------------------------------------|---------|---------|------|------|------|------|------|-----|
| A1  | IGWPRFRPRLPRTPRYPYPR YPTWPTYPRYPSWPRYA-NH2 | 37     | 11.29             | 0.99     | 0.705              | 0.849                      | NO                             | NO            | YES - antibacterial             | 0.291         | Insect - lebecin       | 83%  | 94%             | antiviral                       | 85%                            | antibacterial | 42.85%      | cathelicidin PR39                       | 1       | NO      | CPP  | 29%  | 21%  | 8%   | 16%  | 8%  |
| A2  | IGWPRFRPRLPRTPRYPYPR YPRWPTYPRYPSWPRYA-NH2 | 37     | 11.51             | 0.997    | 0.719              | 0.903                      | NO                             | NO            | YES - antibacterial             | 0.304         | Insect - lebecin       | 89%  | 94%             | antiviral                       | 87%                            | antibacterial | 45.23%      | cathelicidin PR39                       | 1       | NO      | CPP  | 29%  | 24%  | 8%   | 16%  | 5%  |
| A3  | YGWPRMPRIPRKPYPYPR YPRWPRHPTIYA-NH2        | 32     | 11.57             | 0.975    | 0.512              | 0.878                      | NO                             | YES           | YES - antibacterial             | 0.413         | Insect - lebecin       | 95%  | 94%             | antiviral                       | 94%                            | antibacterial | 42.42%      | A3-APO                                  | 1       | NO      | CPP  | 28%  | 25%  | 6%   | 15%  | 3%  |
| A4  | YSWPRMPRIPRKPYPYPR YPRYPRWPRHPTIYA-NH2     | 35     | 11.51             | 0.992    | 0.558              | 0.697                      | NO                             | NO            | YES - antibacterial             | 0.305         | Insect - lebecin       | 94%  | 93%             | antiviral                       | 93%                            | antibacterial | 42.22%      | Arasin-2                                | 1       | NO      | CPP  | 28%  | 25%  | 5%   | 17%  | 2%  |
| A5  | YSWPRMPRIPRKPYPYPR YPRWPRWPRQPTIYA-NH2     | 35     | 11.72             | 0.982    | 0.541              | 0.424                      | NO                             | NO            | YES - antibacterial             | 0.399         | Insect - lebecin       | 94%  | 99%             | antibacterial                   | 95%                            | antibacterial | 43.47%      | Arasin-2                                | 1       | NO      | CPP  | 28%  | 25%  | 8%   | 14%  | 2%  |
| A6  | YSWPRMPRIPRKPYPYPR WPRHPTIYA-NH2           | 29     | 11.63             | 0.977    | 0.694              | 0.732                      | NO                             | NO            | YES - antibacterial             | 0.428         | Insect - lebecin       | 89%  | 95%             | antifungal                      | 96%                            | antibacterial | 44.82%      | A3-APO                                  | 1       | NO      | CPP  | 27%  | 24%  | 6%   | 17%  | 3%  |
| A7  | YSWPRMPRIPRKPYPYPR YPRWPRHPTIYA-NH2        | 32     | 11.56             | 0.993    | 0.702              | 0.742                      | NO                             | NO            | YES - antibacterial             | 0.357         | Insect - lebecin       | 92%  | 94%             | antifungal                      | 95%                            | antibacterial | 42.42%      | A3-APO                                  | 1       | NO      | CPP  | 28%  | 25%  | 6%   | 15%  | 3%  |
| A8  | YSWPRMPRIPRKPYPYPR YPRWPRHPTIYA-NH2        | 32     | 11.56             | 0.973    | 0.515              | 0.69                       | NO                             | NO            | YES - antibacterial             | 0.391         | Insect - lebecin       | 92%  | 95%             | antibacterial                   | 95%                            | antibacterial | 42.42%      | A3-APO                                  | 1       | NO      | CPP  | 28%  | 25%  | 6%   | 15%  | 3%  |
| A9  | YSWPRIPRIPRKPYPYPR YPRYPRWPRHPTIYA-NH2     | 35     | 11.51             | 0.997    | 0.705              | 0.837                      | NO                             | NO            | YES - antibacterial             | 0.309         | Insect - apidaecin     | 93%  | 94%             | antiviral                       | 93%                            | antibacterial | 43.18%      | cathelicidin OaBac5                     | 1       | NO      | CPP  | 28%  | 25%  | 5%   | 17%  | 2%  |
| B1  | LRWTPPTSPYPRYTRSRGSR WSR-NH2               | 23     | 12.01             | 0.201    | 0.621              | 0.977                      | NO                             | NO            | YES - antibacterial, antifungal | -0.445        | /                      | 100% | 95%             | antiviral                       | 68%                            | antibacterial | 40%         | A3-APO                                  | 0       | NO      | CPP  | 17%  | 26%  | 8%   | 8%   | 13% |
| C1  | GRRRKYRYWRRGDRYWR GVTIQERSKSTLNTED         | 35     | 11.44             | 0.697    | 0.466              | 0.962                      | NO                             | NO            | YES - antibacterial             | 0.189         | Mammals - cathelicidin | 100% | 89%             | antifungal                      | 68%                            | antibacterial | 35%         | rhesus macaque myeloid alpha-defensin-6 | 1       | YES     | CPP  | 0%   | 28%  | 5%   | 8%   | 8%  |
| C2  | GRRRRRYRYWRRGLTIQGR SSTTITGD               | 27     | 12.1              | 0.619    | 0.508              | 0.978                      | NO                             | NO            | YES - antibacterial, antifungal | -0.119        | /                      | 100% | 92%             | antiviral                       | 71%                            | antibacterial | 37.50%      | chicken cathelicidin 2                  | 1       | NO      | CPP  | 0%   | 33%  | 3%   | 7%   | 14% |
| C3  | RRRRRYRYWRRGLTIQGRSK SPLNTGD               | 28     | 12.1              | 0.65     | 0.467              | 0.91                       | NO                             | NO            | YES - antibacterial, antifungal | 0.168         | Mammals - cathelicidin | 100% | 93%             | antiviral                       | 79%                            | antibacterial | 37.83%      | rhesus macaque myeloid alpha-defensin-6 | 1       | NO      | CPP  | 3%   | 32%  | 3%   | 7%   | 7%  |
| C4  | RRRRRYRYWRRGVTIQGRS KYSTLNTGE              | 28     | 11.91             | 0.711    | 0.458              | 0.878                      | NO                             | NO            | NO                              | 0.091         | Mammals - cathelicidin | 100% | 93%             | antiviral                       | 65%                            | antibacterial | 36.83%      | rhesus macaque myeloid alpha-defensin-6 | 1       | YES     | CPP  | 0%   | 32%  | 3%   | 10%  | 10% |
| C5  | RRRRWPRRVTRRIRIPRYLTL NTH                  | 24     | 12.6              | 0.997    | 0.67               | 0.996                      | YES                            | NO            | YES - antibacterial, antifungal | -0.138        | /                      | 100% | 98%             | antiviral                       | 97%                            | antibacterial | 39.28%      | WLBUE2                                  | 1       | YES     | CPP  | 8%   | 41%  | 4%   | 4%   | 12% |
| C6  | RRRRFRVIRIRIRPKYLTLIN TE                   | 24     | 12.37             | 0.997    | 0.637              | 0.993                      | YES                            | NO            | YES - antibacterial, antifungal | -0.043        | /                      | 100% | 93%             | antiviral                       | 82%                            | antibacterial | 41.37%      | chicken cathelicidin 2                  | 1       | YES     | CPP  | 4%   | 41%  | 0%   | 4%   | 8%  |
| C7  | RRRRWRRIRRGISIRLPKFAT LNTTE                | 25     | 12.54             | 0.981    | 0.719              | 0.984                      | YES                            | NO            | YES - antibacterial, antifungal | -0.007        | /                      | 100% | 97%             | antiviral                       | 89%                            | antibacterial | 39.28%      | NRC-3                                   | 1       | YES     | CPP  | 4%   | 36%  | 4%   | 0%   | 8%  |
| C8  | RRRRWRRIRRGISHRLPKFA TLNSD                 | 25     | 12.54             | 0.935    | 0.593              | 0.983                      | YES                            | YES           | YES - antibacterial, antifungal | -0.089        | /                      | 100% | 95%             | antiviral                       | 90%                            | antibacterial | 35.71%      | NRC-3                                   | 1       | YES     | CPP  | 4%   | 36%  | 4%   | 0%   | 4%  |
| C9  | RRRRRYRYWRRGLTIQGRP KSLPLNTGD              | 28     | 12.1              | 0.722    | 0.495              | 0.903                      | NO                             | NO            | YES - antibacterial, antifungal | 0.015         | Mammals - cathelicidin | 100% | 94%             | antiviral                       | 81%                            | antibacterial | 36.84%      | BG-CATH37                               | 2       | YES     | CPP  | 7%   | 32%  | 3%   | 7%   | 7%  |
| C10 | GRRRRRYRYWRRGYRSWRR GVTIQERSKSTLNTED       | 35     | 11.77             | 0.602    | 0.501              | 0.984                      | NO                             | NO            | YES - antibacterial             | 0.039         | Mammals - cathelicidin | 100% | 89%             | antifungal                      | 74%                            | antibacterial | 36.58%      | rhesus macaque myeloid alpha-defensin-6 | 1       | NO      | CPP  | 0%   | 31%  | 5%   | 8%   | 8%  |
| D1  | WGRRWRIRIPSPRLRPWP RPYPWPWSATINTDQ         | 36     | 12.3              | 0.509    | 0.681              | 0.455                      | NO                             | NO            | YES - antibacterial             | 0.346         | Frog - other           | 0%   | 99%             | antifungal                      | 94%                            | antibacterial | 41.60%      | cathelicidin OaBac5                     | 1       | NO      | CPP  | 25%  | 25%  | 11%  | 2%   | 5%  |
| D2  | WGRRWRIRIPRPPWPWP PKWWSATINTDQ             | 32     | 12.48             | 0.738    | 0.699              | 0.726                      | NO                             | NO            | YES - antibacterial             | 0.146         | Frog - other           | 99%  | 99%             | antifungal                      | 96%                            | antibacterial | 39.02%      | CRS4C-2                                 | 1       | NO      | CPP  | 21%  | 25%  | 12%  | 0%   | 6%  |
| D3  | WPRFPKPKPTYSGPTYGPT YPRPTLPRPTWRRSATIGT DH | 42     | 11.4              | 0.321    | 0.405              | 0.013                      | NO                             | NO            | YES - antibacterial             | 0.007         | Frog - other           | 0%   | 99%             | antifungal                      | 81%                            | antibacterial | 38.29%      | Gm pro-rich pept 2                      | 1       | NO      | CPP  | 26%  | 14%  | 4%   | 7%   | 16% |
| D4  | WPRFPKPKPTYSGPTYGPT TWPRPTWRRSATIGT TEH    | 42     | 11.38             | 0.345    | 0.419              | 0.008                      | NO                             | NO            | YES - antibacterial             | 0.117         | Frog - other           | 0%   | 99%             | antifungal                      | 74%                            | antibacterial | 37.25%      | cathelicidin OaBac5                     | 1       | NO      | CPP  | 28%  | 14%  | 9%   | 4%   | 16% |
